# Supplementary material for: Comparison of Accelerometry-Based Measures of Physical Activity: Retrospective Observational Data Analysis Study
Source: JMIR Mhealth Uhealth. 2022 Jul 22;10(7):e38077. doi: 10.2196/38077 (PMC9356340; doi:10.2196/38077)
Supplement: Multimedia Appendix 1 [file mhealth_v10i7e38077_app1.docx]

# Appendix 1. Raw Accelerometry Data Quality Control

Three raw data quality check flags were adapted from a set of nine flags recently introduced by the release of the NHANES 2011-2012 wave protocol [1]. The selected flags subset represents intuitive flags that are meant to "determine signal patterns that were unlikely to be a result of human movement" but are not aimed at identifying non-wear. To provide the flags definition, we denote a raw data observation as a vector , where is an acceleration measurement along axis at time .

First, large changes in acceleration values ("spikes") were identified. Specifically, an observation was flagged if for any axis , had an adjacent observation, or , with an absolute difference greater than a threshold of 14.7 *g*. The 14.7 *g* threshold was adapted from NHANES protocol (11 *g*), as the NHANES devices had a dynamic range of 12 *g*, and the BLSA devices had a range of 16 *g*, so our threshold is proportional (11/12) to our data. Second, an observation was flagged if any axis measurement occurred near the device maximum limit (here: 8 *g*, NHANES protocol: 6 *g*) with a tolerance margin (0.05 *g*), which translates to being equal to or greater than 7.95 *g*. Third, an observation was flagged if any axis measurement occurred near the device minimum limit (here: -8 *g*, NHANES protocol: -6 *g*), including a tolerance margin (0.05 *g*), and had same-axis adjacent observation also near the device minimum limit. These three flags were combined and the raw data observation was flagged as valid if it had none of the three flags; otherwise it was invalid.

## References

1. NHANES 2011-2012 Data Documentation (2020). National Health and Nutrition Examination Survey 2011-2012. Data Documentation, Codebook, and Frequencies: Quality Assurance and Quality Control. Available from: https://wwwn.cdc.gov/Nchs/Nhanes/2011-2012/PAXMIN_G.htm. Last accessed on 2022-07-05.
